# Supplementary material for: Associations of Warfarin Use with Risks of Ischemic Cerebrovascular Events and Major Bleeding in Patients with Hyperthyroidism-Related Atrial Fibrillation
Source: MDPI journal article supplement (doi:10.3390/biomedicines10112670), 2022-10-22
Supplement: s1 [file s1]

# Supplementary Material

## Associations of warfarin use with risks of ischemic cerebrovascular events and major bleeding in patients with hyperthyroidism-related atrial fibrillation

Sian-De Liu<sup>1,2,\*</sup>, Shwu-Jiuan Lin<sup>1,3,\*</sup>, Chin-Ying Ray<sup>4,5</sup>, Fang-Tsyr Lin<sup>6</sup>, Weei-Chin Lin<sup>6,7</sup>,  
Li-Hsuan Wang<sup>1,8</sup>

<sup>1</sup> School of Pharmacy, Taipei Medical University, Taipei, Taiwan

<sup>2</sup> Department of Pharmacy, New Taipei Municipal TuCheng Hospital (Built and Operated by Chang Gung Medical Foundation), New Taipei City, Taiwan

<sup>3</sup> PhD Program in Clinical Drug Development of Herbal Medicine, College of Pharmacy, Taipei Medical University, Taipei, Taiwan

<sup>4</sup> Department of Clinical Pharmacy, Chang Gung Memorial Hospital, Linkou, Taoyuan, Taiwan

<sup>5</sup> Heart Failure Center, Chang Gung Memorial Hospital, Linkou, Taoyuan, Taiwan

<sup>6</sup> Section of Hematology/Oncology, Department of Medicine, Baylor College of Medicine, Houston, Texas, USA

<sup>7</sup> Department of Molecular and Cellular Biology, Baylor College of Medicine, Houston, Texas, USA

<sup>8</sup> Department of Pharmacy, Taipei Medical University Hospital, Taipei, Taiwan.

### Corresponding author:

Prof Li-Hsuan Wang, School of Pharmacy, Taipei Medical University, 250 Wu-Hsing St., Taipei 11031, Taiwan. E-mail address: shiuan@tmu.edu.tw

\* These authors contributed equally to this work.

## Catalog

|                                                                                                                                                                                   |    |
|-----------------------------------------------------------------------------------------------------------------------------------------------------------------------------------|----|
| <b>Table S1</b> Definitions and codes of comorbidities and outcomes .....                                                                                                         | 3  |
| <b>Table S2</b> Results of univariable and multivariable Robust Cox proportional hazards regression analyses for the outcome of stroke/TIA.....                                   | 5  |
| <b>Table S3</b> Results of univariable and multivariable Robust Cox proportional hazards regression analyses for the outcome of major bleeding. ....                              | 6  |
| <b>Table S4</b> Sensitivity analysis for new medications after index date. ....                                                                                                   | 7  |
| <b>Figure S1</b> Study flowchart and sensitivity analysis (warfarin versus aspirin users).....                                                                                    | 8  |
| <b>Table S5</b> Results of univariable and multivariable Robust Cox proportional hazards regression analyses for the outcome of stroke/TIA among warfarin versus aspirin users .. | 10 |

**Table S1** Definitions and codes of comorbidities and outcomes

| <b>Diseases</b>                                                                    | <b>ICD-9-CM code</b>                                                                                   | <b>ICD-10-CM code</b>                                                                                                                                                                                            |
|------------------------------------------------------------------------------------|--------------------------------------------------------------------------------------------------------|------------------------------------------------------------------------------------------------------------------------------------------------------------------------------------------------------------------|
| Atrial fibrillation                                                                | 427.31                                                                                                 | I48.0, I48.1, I48.2, I48.91                                                                                                                                                                                      |
| Hyperthyroidism                                                                    | 242                                                                                                    | E05                                                                                                                                                                                                              |
| Hypothyroidism                                                                     | 243                                                                                                    | E03                                                                                                                                                                                                              |
| Ischemic stroke                                                                    | 433, 434, 436, 852, 853                                                                                | I67.89, I63, I63-I64, G458 G458-459, S01.90XA, S06.4X0AS06.4X0A-S06.4X9A, S06.5X0AS06.5X0A-S06.5X9A, S06.6X0A S06.6X0A-S06.6X9A, S06.340AS06.340A-S06.349A, S06.350AS06.350A-S06.359A, S06.360AS06.360A-S06.369A |
| Transient ischemic attack                                                          | 435                                                                                                    | G45                                                                                                                                                                                                              |
| Hypertension                                                                       | 401, 402                                                                                               | I10, I11, I12, I13, I14, I15                                                                                                                                                                                     |
| Myocardial infarction                                                              | 410, 412                                                                                               | I21, I22, I25.2                                                                                                                                                                                                  |
| Congestive heart failure                                                           | 398.91, 402.01, 402.11, 402.91, 404.01, 404.03, 404.11, 404.13, 404.91, 404.93, 425.4 425.4-425.9, 428 | I09.9, I11.0, I13.0, I13.2, I25.5, I42.0, I42.5I42.5-I42.9, I43, I50, P29.0                                                                                                                                      |
| Peripheral vascular disease (with atherosclerosis)                                 | 093.0, 437.3, 440, 441, 443.1-443.9, 471, 557.1, 557.9                                                 | V434, I70, I71, I73.1, I73.8, I73.9, I77.1, I79.0, I79.2, K55.1, K55.8, K55.9, Z95.8, Z95.9                                                                                                                      |
| Cerebrovascular disease                                                            | 362.34, 430-438                                                                                        | G45, G46, H34.0, I60, I61, I62, I63, I64, I65, I66, I67, I68, I69                                                                                                                                                |
| Diabetes mellitus                                                                  | 250                                                                                                    | E11, E10                                                                                                                                                                                                         |
| Chronic kidney disease                                                             | 580-589                                                                                                | I12, I13, N00-N05, N07, N11, N14, N17-N19, Q61                                                                                                                                                                   |
| Chronic obstructive pulmonary disease                                              | 490, 491.0, 491.1, 491.2, 491.20-491.22, 491.8, 491.9, 492.0, 492.8, 494, 494.0, 494.1, 496            | J40, J41.0, J41.1, J41.8, J42, J43.0-J43.2, J43.8, J43.9, J44.0, J44.1, J44.9, J47.0, J47.1, J47.9                                                                                                               |
| Any malignancy, including lymphoma and leukemia, except malignant neoplasm of skin | 140-172, 174-195.8, 200-208, 238.6                                                                     | C00-C26, C30-C34, C37-C41, C43, C45-C58, C60-C76, C81-C85, C88, C90-C97                                                                                                                                          |
| Rheumatic disease                                                                  | 446.5, 710.0, 710.1, 710.2, 710.3, 710.4, 714.0, 714.1, 714.2, 714.8, 725                              | M05, M06, M315, M32, M33, M34, M351, M353, M36.0                                                                                                                                                                 |

|                                                                        |                                                                                                                                                                                                                                                                              |                                                                                                                                                                                                                                                                |
|------------------------------------------------------------------------|------------------------------------------------------------------------------------------------------------------------------------------------------------------------------------------------------------------------------------------------------------------------------|----------------------------------------------------------------------------------------------------------------------------------------------------------------------------------------------------------------------------------------------------------------|
| Hyperlipidemia                                                         | 272.0, 272.1, 272.2,<br>272.3, 272.4, 272.9                                                                                                                                                                                                                                  | E780, E781, E782, E783, E784, E756, E785,<br>E78.7                                                                                                                                                                                                             |
| Cardiomyopathy (dilated,<br>hypertrophic, restrictive,<br>obstructive) | 425                                                                                                                                                                                                                                                                          | I42                                                                                                                                                                                                                                                            |
| Thromboembolism<br>(Pulmonary embolism+DVT)                            | 415.19, I26.99 , I26.09,<br>453.8, 453.9, 453.40,<br>453.41, 453.42                                                                                                                                                                                                          | I82.2, I82.4-I82.9, I82.A, I82.B, I82.C                                                                                                                                                                                                                        |
| Valve anomalies                                                        | 746                                                                                                                                                                                                                                                                          | Q22, Q23, Q24                                                                                                                                                                                                                                                  |
| <b>Major bleeding</b>                                                  |                                                                                                                                                                                                                                                                              |                                                                                                                                                                                                                                                                |
| Intracranial                                                           | 430, 431, 432.0, 432.1,<br>432.9, 852.0, 852.2,<br>852.4, 853.0                                                                                                                                                                                                              | I60, I61, I62, S06.340A S06.340A-S06.349A,<br>S06.350AS06.350A-S06.359A,<br>S06.360AS06.360A-06.369A,<br>S06.4X0AS06.4X0A-S06.4X9A,<br>S06.5X0AS06.5X0A-S06.5X9A,<br>S06.6X0AS06.6X0A-S06.6X9A                                                                 |
| Gastrointestinal                                                       | 530.7, 531, 531.2, 531.4,<br>531.6, 532, 532.2, 532.4,<br>532.6, 533, 533.2, 533.4,<br>533.6, 534, 534.2, 534.4,<br>534.6, 569.3, 535.01,<br>535.11, 535.21, 535.31,<br>535.41, 535.51, 535.61,<br>535.71, 537.83, 537.84,<br>562.02, 562.03, 562.12,<br>562.13, 569.85, 578 | K22.6, K25-K28 , K29.01, K29.21, K29.31,<br>K29.41, K29.51, K29.61, K29.71, K29.81,<br>K29.91, K31.811, K31.82, K52.81, K55.21,<br>K56.60, K57.01, K57.11, K57.13, K57.21,<br>K57.31, K57.33, K57.81, K57.91, K57.93,<br>K62.5, K92.0-K92.2                    |
| Other sites                                                            | 336.1, 363.6, 372.72,<br>376.32, 377.42, 379.23,<br>593.81, 866.01, 866.02,<br>866.11, 866.12, 719.1,<br>729.92, 423.0, 772.5                                                                                                                                                | G95.11, G95.19, H05.23, H11.3, H31.3,<br>H43.1, H47.02, I31.2, M25.0, N28.0, P54.4,<br>S31.001A, S37.011A, S37.012A, S37.019A,<br>S37.021A, S37.022A, S37.029A, S37.031A,<br>S37.032A, S37.039A, S37.041A, S37.042A,<br>S37.049A, S37.051A, S37.052A, S37.059A |

*DVT* deep vein thrombosis, *ICD-9-CM* International Classification of Disease-Ninth Revision- Clinical Modification, *ICD-10-CM* International Classification of Disease-Tenth Revision-Clinical Modification

**Table S2** Results of univariable and multivariable Robust Cox proportional hazards regression analyses for the outcome of stroke/TIA

|                                       | <b>crude HR (95% CI)</b> | <b>p value</b> | <b>adjusted HR (95% CI)</b> | <b>p value</b> |
|---------------------------------------|--------------------------|----------------|-----------------------------|----------------|
| Age, years                            | 1.04 (1.02–1.06)         | <.0001         | 1.07 (1.02–1.12)            | 0.010          |
| Gender/Male                           | 0.60 (0.34–1.07)         | 0.082          | 0.74 (0.30–1.78)            | 0.494          |
| CHA2DS2-VASc                          | 1.62 (1.31–2.01)         | <.0001         | 0.56 (0.26–1.22)            | 0.147          |
| Hypertension                          | 3.85 (1.99–7.44)         | <.0001         | 2.86 (0.88–9.35)            | 0.082          |
| Congestive heart failure              | 2.69 (1.47–4.91)         | 0.001          | 4.30 (1.15–16.09)           | 0.030          |
| Peripheral vascular disease           | 4.98 (1.55–15.94)        | 0.007          | 6.01 (1.56–23.11)           | 0.009          |
| Cerebrovascular disease               | 1.27 (0.19–8.30)         | 0.807          | NA                          | NA             |
| Diabetes mellitus                     | 2.49 (1.28–4.83)         | 0.007          | 2.23 (0.64–7.79)            | 0.208          |
| Chronic kidney disease                | 3.53 (0.78–16.05)        | 0.103          | NA                          | NA             |
| Chronic obstructive pulmonary disease | 1.71 (0.83–3.53)         | 0.149          | NA                          | NA             |
| Hyperlipidemia                        | 1.23 (0.52–2.88)         | 0.639          | NA                          | NA             |
| Amiodarone                            | 1.08 (0.50–2.37)         | 0.842          | NA                          | NA             |
| Aspirin                               | 4.55 (2.27–9.13)         | <.0001         | 3.42 (1.37–8.54)            | 0.008          |
| Clopidogrel                           | 1.35 (0.17–10.55)        | 0.776          | NA                          | NA             |
| NSAID                                 | 2.09 (0.86–5.08)         | 0.103          | NA                          | NA             |
| Statin                                | 1.42 (0.53–3.79)         | 0.482          | NA                          | NA             |

*CI* confidence interval, *HR* hazard ratio, *NA* not available, *NSAID*, non-steroid anti-inflammatory drug, *TIA* transient ischemic attack

**Table S3** Results of univariable and multivariable Robust Cox proportional hazards regression analyses for the outcome of major bleeding

|                                       | <b>crude HR (95% CI)</b> | <b>p value</b> | <b>adjusted HR (95% CI)</b> | <b>p value</b> |
|---------------------------------------|--------------------------|----------------|-----------------------------|----------------|
| Age, years                            | 1.02 (1.00–1.03)         | 0.020          | 1.00 (0.97–1.03)            | 0.950          |
| Gender/Male                           | 0.79 (0.53–1.18)         | 0.247          | 1.25 (0.67–2.34)            | 0.485          |
| CHA2DS2-VASc                          | 1.32 (1.17–1.49)         | <.0001         | 1.24 (0.74–2.10)            | 0.413          |
| Hypertension                          | 2.93 (2.02–4.23)         | <.0001         | 2.11 (1.15–3.88)            | 0.016          |
| Congestive heart failure              | 1.53 (1.01–2.31)         | 0.044          | 0.99 (0.35–2.81)            | 0.987          |
| Peripheral vascular disease           | 2.00 (0.87–4.61)         | 0.103          | NA                          | NA             |
| Cerebrovascular disease               | 0.88 (0.27–2.84)         | 0.832          | NA                          | NA             |
| Diabetes mellitus                     | 2.12 (1.37–3.26)         | 0.001          | 1.19 (0.48–2.96)            | 0.706          |
| Chronic kidney disease                | 1.79 (0.73–4.38)         | 0.200          | NA                          | NA             |
| Chronic obstructive pulmonary disease | 2.20 (1.40–3.47)         | 0.001          | 0.85 (0.50–1.45)            | 0.552          |
| Hyperlipidemia                        | 2.42 (1.39–4.21)         | 0.002          | 1.30 (0.73–2.31)            | 0.377          |
| Cardiomyopathy                        | 0.57 (0.18–1.84)         | 0.350          | NA                          | NA             |
| Amiodarone                            | 0.93 (0.59–1.45)         | 0.732          | NA                          | NA             |
| Aspirin                               | 2.65 (1.87–3.74)         | <.0001         | 1.85 (1.20–2.85)            | 0.006          |
| Clopidogrel                           | 2.76 (0.77–9.77)         | 0.117          | NA                          | NA             |
| NSAID                                 | 1.55 (0.91–2.65)         | 0.111          | NA                          | NA             |
| Statin                                | 2.23 (1.03–4.85)         | 0.043          | 0.77 (0.35–1.71)            | 0.527          |

*CI* confidence interval, *HR* hazard ratio, *NA* not available, *NSAID*, non-steroid anti-inflammatory drug

**Table S4** Sensitivity analysis for new medications after index date

|                                                | Warfarin users<br>N=90 | Warfarin nonusers<br>N=168 | <i>P</i> value |
|------------------------------------------------|------------------------|----------------------------|----------------|
| <b>Number of new users</b>                     |                        |                            |                |
| received DOAC (n, %)                           | 19 (21.1%)             | 12 (7.1%)                  | 0.001          |
| received antiplatelet medication (n, %)        | 6 (6.7%)               | 10 (6.0%)                  | 0.821          |
| <b>Outcomes after excluding new medication</b> |                        |                            |                |
| aHR for Stoke/TIA (95% CI)                     | 1.18 (0.53–2.64)       | Reference                  | 0.693          |
| aHR for Major bleeding (95% CI)                | 0.95 (0.58–1.55)       | Reference                  | 0.822          |

*aHR* adjusted hazard ratio, *CI* confidence interval, *DOAC* direct oral anticoagulants, *TIA* transient ischemic attack

**Figure S1** Study flowchart and sensitivity analysis (warfarin versus aspirin users)

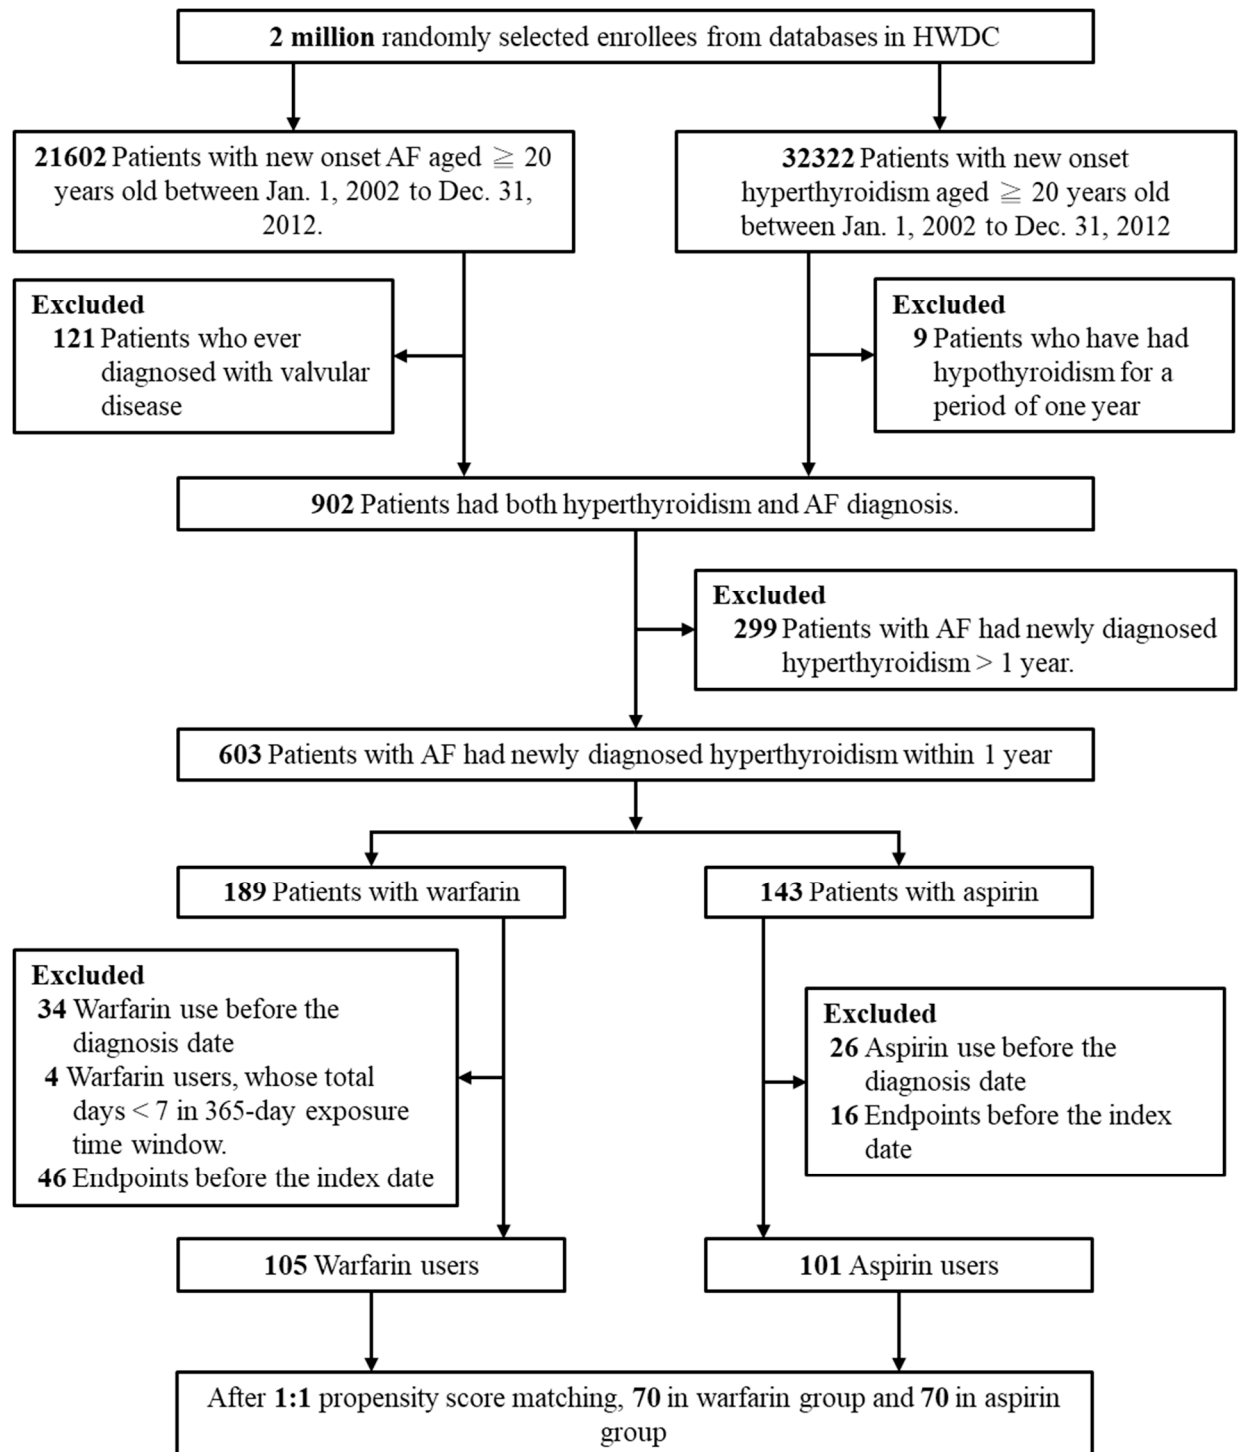



*AF* atrial fibrillation, *HWDC* Health and Welfare Data Science Center

**Table S5** Results of univariable and multivariable Robust Cox proportional hazards regression analyses for the outcome of stroke/TIA among warfarin versus aspirin users

|                                       | <b>crude HR (95% CI)</b> | <b>p value</b> | <b>adjusted HR (95% CI)</b> | <b>p value</b> |
|---------------------------------------|--------------------------|----------------|-----------------------------|----------------|
| Age, years                            | 1.04 (1.01–1.07)         | 0.007          | 1.09 (0.99–1.21)            | 0.090          |
| Gender/Male                           | 0.87 (0.41–1.86)         | 0.723          | 0.57 (0.08–3.95)            | 0.571          |
| CHA2DS2-VASc                          | 1.57 (1.22–2.02)         | 0.0004         | 0.32 (0.07–1.47)            | 0.144          |
| Hypertension                          | 5.04 (2.27–11.18)        | <0.0001        | 9.52 (1.18–76.58)           | 0.034          |
| Congestive heart failure              | 2.24 (1.12–4.51)         | 0.023          | 8.46 (0.86–83.41)           | 0.067          |
| Peripheral vascular disease           | 2.50 (0.23–27.84)        | 0.455          | NA                          | NA             |
| Diabetes mellitus                     | 2.94 (1.46–5.93)         | 0.003          | 2.89 (0.45–18.58)           | 0.265          |
| Chronic kidney disease                | 1.26 (0.15–10.73)        | 0.833          | 0.88 (0.05–15.58)           | 0.929          |
| Chronic obstructive pulmonary disease | 1.78 (0.64–4.95)         | 0.272          | NA                          | NA             |
| Hyperlipidemia                        | 0.89 (0.20–3.91)         | 0.874          | NA                          | NA             |
| Amiodarone                            | 0.95 (0.35–2.59)         | 0.925          | NA                          | NA             |
| Clopidogrel                           | 12.82 (7.11–23.10)       | <0.0001        | 7.16 (1.04–49.35)           | 0.046          |
| NSAID                                 | 1.62 (0.60–4.36)         | 0.338          | NA                          | NA             |
| Statin                                | 4.49 (1.07–18.82)        | 0.040          | 2.16 (0.33–14.21)           | 0.424          |

*CI* confidence interval, *HR* hazard ratio, *NA* not available, *NSAID*, non-steroid anti-inflammatory drug, *TIA* transient ischemic attack
